# Supplementary material
Source: PubMed Central journal article supplement (PMC1149433)
Supplement: pnas_0502885102_1.pdf [file pnas_0502885102_1.pdf]

**Table 1. Platelet-derived growth factor receptor (PDGFR) signaling through phospholipase C $\gamma$  (PLC $\gamma$ ) and phosphatidylinositol 3-kinase (PI3K) is required for mesoderm cell survival**

| Binding site(s)             | mRNA                                          | <i>n</i> | DMSO/AP1510 | Normal, % | Dead cells, % |
|-----------------------------|-----------------------------------------------|----------|-------------|-----------|---------------|
| Wild type                   | <i>iPDGFR<math>\alpha</math>/R37</i>          | 215      | DMSO        | 30        | 70            |
|                             | <i>iPDGFR<math>\alpha</math>/R37</i>          | 214      | AP1510      | 65        | 35            |
|                             | <i>iPDGFR<math>\alpha</math>-F572/4/R37</i>   | 49       | DMSO        | 33        | 67            |
| No Src                      | <i>iPDGFR<math>\alpha</math>-F572/4/R37</i>   | 49       | AP1510      | 55        | 45            |
|                             | <i>iPDGFR<math>\alpha</math>-Y572/4/R37</i>   | 41       | DMSO        | 22        | 78            |
| Only Src                    | <i>iPDGFR<math>\alpha</math>-Y572/4/R37</i>   | 38       | AP1510      | 21        | 79            |
|                             | <i>iPDGFR<math>\alpha</math>-F720/R37</i>     | 47       | DMSO        | 38        | 62            |
| No SHP-2                    | <i>iPDGFR<math>\alpha</math>-F720/R37*</i>    | 46       | AP1510      | 59        | 39            |
|                             | <i>iPDGFR<math>\alpha</math>-Y720/R37*</i>    | 43       | DMSO        | 23        | 74            |
| Only SHP-2                  | <i>iPDGFR<math>\alpha</math>-Y720/R37</i>     | 46       | AP1510      | 28        | 72            |
|                             | <i>iPDGFR<math>\alpha</math>-F731/42/R37</i>  | 45       | DMSO        | 2         | 98            |
| No PI3K                     | <i>iPDGFR<math>\alpha</math>-F731/42/R37</i>  | 47       | AP1510      | 2         | 98            |
|                             | <i>iPDGFR<math>\alpha</math>-Y731/42/R37</i>  | 35       | DMSO        | 29        | 71            |
| Only PI3K                   | <i>iPDGFR<math>\alpha</math>-Y731/42/R37</i>  | 35       | AP1510      | 26        | 74            |
|                             | <i>iPDGFR<math>\alpha</math>-F762/R37</i>     | 36       | DMSO        | 33        | 67            |
| No Crk                      | <i>iPDGFR<math>\alpha</math>-F762/R37</i>     | 40       | AP1510      | 73        | 28            |
|                             | <i>iPDGFR<math>\alpha</math>-Y762/R37</i>     | 27       | DMSO        | 15        | 85            |
| Only Crk                    | <i>iPDGFR<math>\alpha</math>-Y762/R37</i>     | 24       | AP1510      | 17        | 83            |
|                             | <i>iPDGFR<math>\alpha</math>-F988/R37</i>     | 51       | DMSO        | 25        | 75            |
| No Tyr 988                  | <i>iPDGFR<math>\alpha</math>-F988/R37</i>     | 44       | AP1510      | 23        | 77            |
|                             | <i>iPDGFR<math>\alpha</math>-Y988/R37*</i>    | 45       | DMSO        | 13        | 84            |
| Only Tyr 988                | <i>iPDGFR<math>\alpha</math>-Y988/R37*</i>    | 43       | AP1510      | 9         | 88            |
|                             | <i>iPDGFR<math>\alpha</math>-F1018/R37</i>    | 30       | DMSO        | 10        | 90            |
| No PLC $\gamma$             | <i>iPDGFR<math>\alpha</math>-F1018/R37</i>    | 30       | AP1510      | 13        | 87            |
|                             | <i>iPDGFR<math>\alpha</math>-Y1018/R37</i>    | 34       | DMSO        | 18        | 82            |
| Only PLC $\gamma$           | <i>iPDGFR<math>\alpha</math>-Y1018/R37*</i>   | 35       | AP1510      | 17        | 77            |
|                             | <i>iPDGFR<math>\alpha</math>-F720/62/R37</i>  | 46       | DMSO        | 37        | 63            |
| Src, PI3K, and PLC $\gamma$ | <i>iPDGFR<math>\alpha</math>-F720/62/R37*</i> | 49       | AP1510      | 69        | 28            |
|                             | <i>iPDGFR<math>\alpha</math>-F4/R37*</i>      | 50       | DMSO        | 24        | 74            |
| PI3K and PLC $\gamma$       | <i>iPDGFR<math>\alpha</math>-F4/R37</i>       | 51       | AP1510      | 53        | 47            |
|                             | <i>iPDGFR<math>\alpha</math></i>              | 228      | DMSO        | 100       | 0             |
| Control                     | <i>iPDGFR<math>\alpha</math>*</i>             | 232      | AP1510      | 99        | 0             |

The data presented in Figs. 2-4 are shown. The percentage of embryos that do not contain apoptotic cells (i.e., cells with nonnuclear  $\beta$ -gal staining) is presented for embryos injected with mRNA as described for Figs. 2-4 and with DMSO or AP1510. This percentage is low for some mutants compared with wild type because there may be some basal activity of the receptor construct without the addition of dimerizer.  $\beta$ -gal,  $\beta$ -galactosidase with a nuclear localization signal; *iPDGFR*, *inducible* PDGFR.

\*The remaining percentage of embryos died as a result of microinjection.
